# Supplementary material for: Intramuscular viral delivery of paraplegin rescues peripheral axonopathy in a model of hereditary spastic paraplegia
Source: JCI journal article supplement (doi:10.1172/jci26210), 2005-12-08
Supplement: sd1 [file 1]

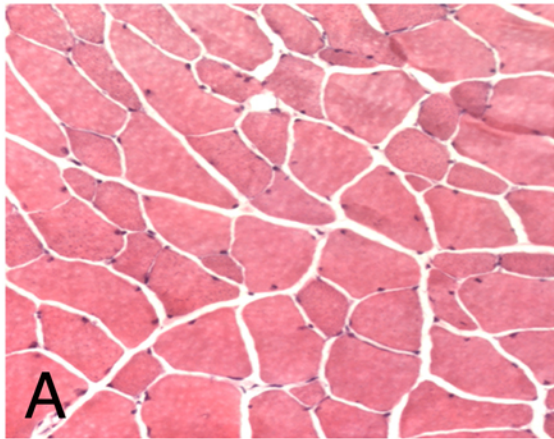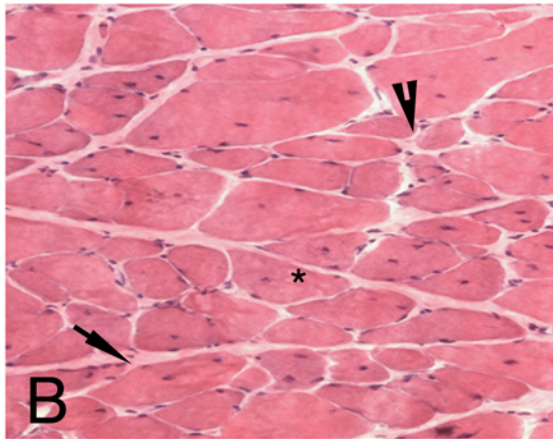

Figure S1

**Figure S1. Rescue of the denervation signs in the skeletal muscles.**

Haematoxylin-eosin staining of muscular sections of 16-month-old *Spg7*<sup>-/-</sup> mice. Six months before, mice were treated with a single intramuscular injection of AAV2-Spg7 on one side and of AAV-LacZ on the other. A reduction of signs of denervation in the side injected with AAV2/2-Spg7 (A) compared to the contralateral control side (B) is appreciated. Note several central nuclei (one example indicated with an asterisk), angulated fibers (arrow) and fiber splitting (arrowhead) in the muscle injected with AAV2/2-LacZ (B). Magnification 20X.
